# Supplementary material
Source: PubMed Central journal article supplement (PMC4667374)
Supplement: aasm.38.12.1913s1.pdf [file aasm.38.12.1913s1.pdf]

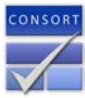

# CONSORT 2010 checklist of information to include when reporting a randomised trial

| Section/Topic                    | Item No | Checklist item                                                                                                                                                                              | Reported on page No |
|----------------------------------|---------|---------------------------------------------------------------------------------------------------------------------------------------------------------------------------------------------|---------------------|
| <b>Title and abstract</b>        |         |                                                                                                                                                                                             |                     |
|                                  | 1a      | Identification as a randomised trial in the title                                                                                                                                           | 1913                |
|                                  | 1b      | Structured summary of trial design, methods, results, and conclusions (for specific guidance see CONSORT for abstracts)                                                                     | 1913                |
| <b>Introduction</b>              |         |                                                                                                                                                                                             |                     |
| Background and objectives        | 2a      | Scientific background and explanation of rationale                                                                                                                                          | 1913, 1914          |
|                                  | 2b      | Specific objectives or hypotheses                                                                                                                                                           | 1914                |
| <b>Methods</b>                   |         |                                                                                                                                                                                             |                     |
| Trial design                     | 3a      | Description of trial design (such as parallel, factorial) including allocation ratio                                                                                                        | 1914                |
|                                  | 3b      | Important changes to methods after trial commencement (such as eligibility criteria), with reasons                                                                                          | -                   |
| Participants                     | 4a      | Eligibility criteria for participants                                                                                                                                                       | 1914                |
|                                  | 4b      | Settings and locations where the data were collected                                                                                                                                        | 1914, 1916          |
| Interventions                    | 5       | The interventions for each group with sufficient details to allow replication, including how and when they were actually administered                                                       | 1916, 1917          |
| Outcomes                         | 6a      | Completely defined pre-specified primary and secondary outcome measures, including how and when they were assessed                                                                          | 1918                |
|                                  | 6b      | Any changes to trial outcomes after the trial commenced, with reasons                                                                                                                       | -                   |
| Sample size                      | 7a      | How sample size was determined                                                                                                                                                              | 1914                |
|                                  | 7b      | When applicable, explanation of any interim analyses and stopping guidelines                                                                                                                | -                   |
| <b>Randomisation:</b>            |         |                                                                                                                                                                                             |                     |
| Sequence generation              | 8a      | Method used to generate the random allocation sequence                                                                                                                                      | 1914                |
|                                  | 8b      | Type of randomisation; details of any restriction (such as blocking and block size)                                                                                                         | 1914                |
| Allocation concealment mechanism | 9       | Mechanism used to implement the random allocation sequence (such as sequentially numbered containers), describing any steps taken to conceal the sequence until interventions were assigned | 1914                |
| Implementation                   | 10      | Who generated the random allocation sequence, who enrolled participants, and who assigned participants to interventions                                                                     | 1914                |
| Blinding                         | 11a     | If done, who was blinded after assignment to interventions (for example, participants, care providers, those assessing outcomes) and how                                                    | -                   |
|                                  | 11b     | If relevant, description of the similarity of interventions                                                                                                                                 | 1916, 1917          |
| Statistical methods              | 12a     | Statistical methods used to compare groups for primary and secondary outcomes                                                                                                               | 1917-9              |
|                                  | 12b     | Methods for additional analyses, such as subgroup analyses and adjusted analyses                                                                                                            | 1917-9              |

**Results**

|                                                      |     |                                                                                                                                                   |                  |
|------------------------------------------------------|-----|---------------------------------------------------------------------------------------------------------------------------------------------------|------------------|
| Participant flow (a diagram is strongly recommended) | 13a | For each group, the numbers of participants who were randomly assigned, received intended treatment, and were analysed for the primary outcome    | 1915, 1916       |
|                                                      | 13b | For each group, losses and exclusions after randomisation, together with reasons                                                                  | 1915             |
| Recruitment                                          | 14a | Dates defining the periods of recruitment and follow-up                                                                                           | -                |
|                                                      | 14b | Why the trial ended or was stopped                                                                                                                | -                |
| Baseline data                                        | 15  | A table showing baseline demographic and clinical characteristics for each group                                                                  | 1915             |
| Numbers analysed                                     | 16  | For each group, number of participants (denominator) included in each analysis and whether the analysis was by original assigned groups           | 1915, 1916, 1922 |
| Outcomes and estimation                              | 17a | For each primary and secondary outcome, results for each group, and the estimated effect size and its precision (such as 95% confidence interval) | 1918-20          |
|                                                      | 17b | For binary outcomes, presentation of both absolute and relative effect sizes is recommended                                                       | 1918-20          |
| Ancillary analyses                                   | 18  | Results of any other analyses performed, including subgroup analyses and adjusted analyses, distinguishing pre-specified from exploratory         | 1921, 1922       |
| Harms                                                | 19  | All important harms or unintended effects in each group (for specific guidance see CONSORT for harms)                                             | -                |

**Discussion**

|                  |    |                                                                                                                  |            |
|------------------|----|------------------------------------------------------------------------------------------------------------------|------------|
| Limitations      | 20 | Trial limitations, addressing sources of potential bias, imprecision, and, if relevant, multiplicity of analyses | 1923, 1924 |
| Generalisability | 21 | Generalisability (external validity, applicability) of the trial findings                                        | 1922-4     |
| Interpretation   | 22 | Interpretation consistent with results, balancing benefits and harms, and considering other relevant evidence    | 1922, 1923 |

**Other information**

|              |    |                                                                                 |            |
|--------------|----|---------------------------------------------------------------------------------|------------|
| Registration | 23 | Registration number and name of trial registry                                  | 1913, 1917 |
| Protocol     | 24 | Where the full trial protocol can be accessed, if available                     | -          |
| Funding      | 25 | Sources of funding and other support (such as supply of drugs), role of funders | 1924       |

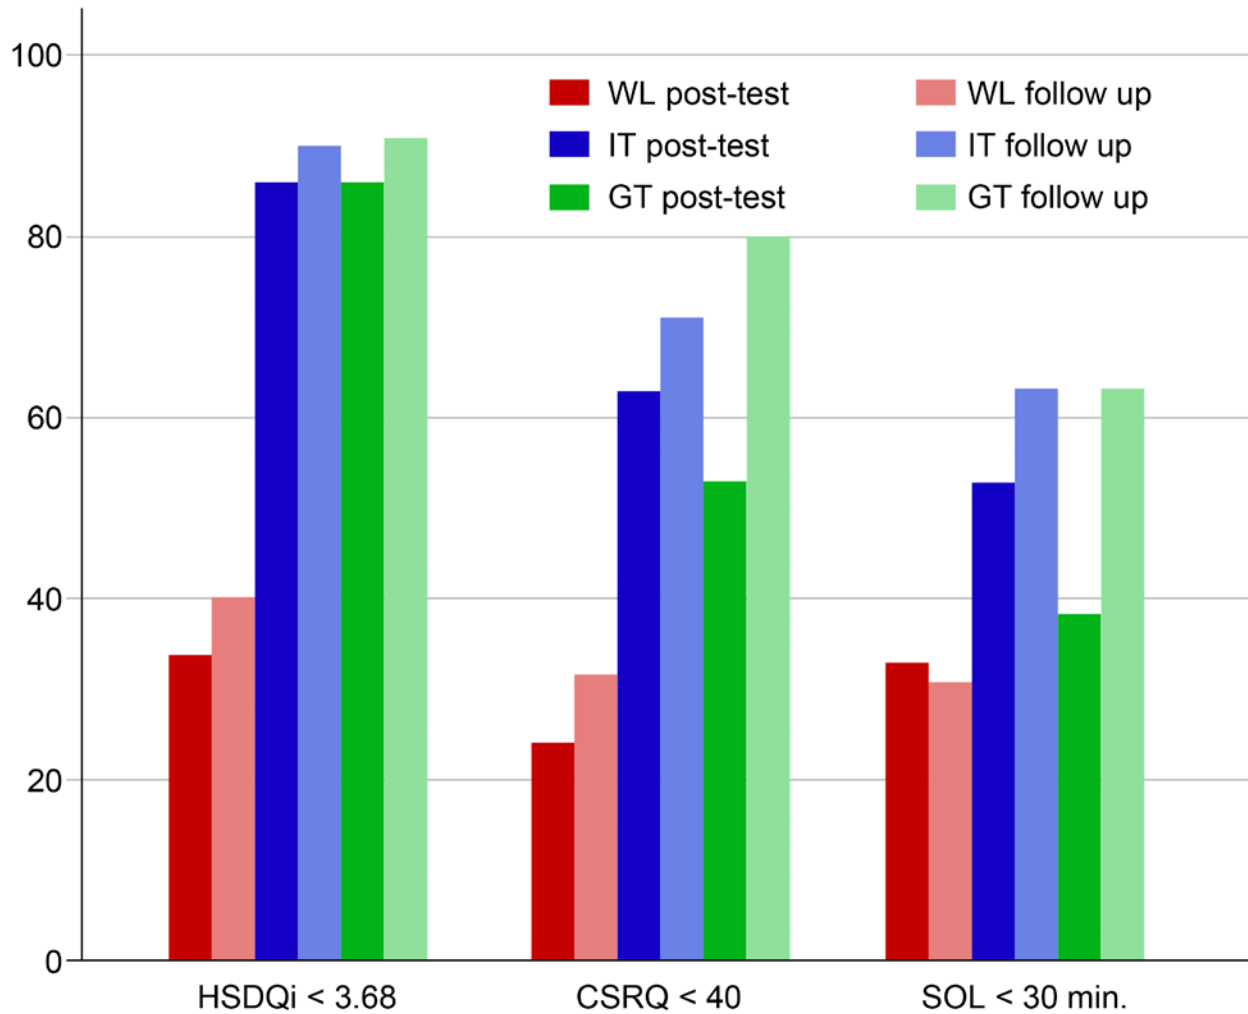

Figure S1. Percentage of participants in each condition with Holland Sleep Disorder Questionnaire insomnia scale (HSDQi) score < 3.68, Chronic Sleep Reduction Questionnaire (CSRQ) score < 40, and average sleep onset latency (SOL) < 30 minutes, at post-test and follow-up. WL=waiting list; IT=internet therapy; GT=group therapy.

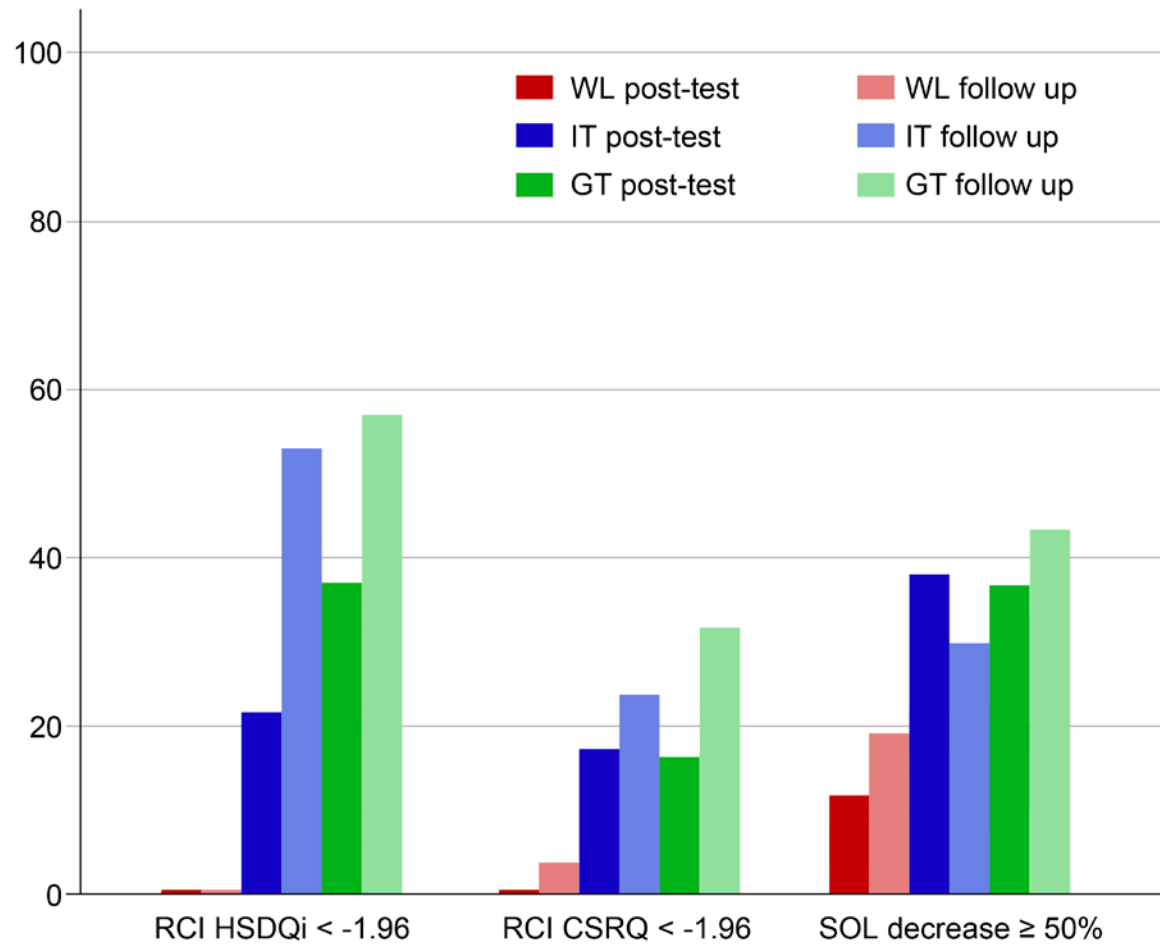

Figure S2. Percentage of participants in each condition with clinically significant change of the Holland Sleep Disorder Questionnaire insomnia scale (HSDQi) score (RCI < -1.96), Chronic Sleep Reduction Questionnaire (CSRQ) score (RCI < -1.96), and average sleep onset latency (SOL) decrease ≥ 50%, at post-test and follow-up. WL=waiting list; IT=internet therapy; GT=group therapy.
